# Supplementary material for: Kinetico-mechanistic studies of the acidolysis of Rh–C bonds in monocyclometallated dirhodium(ii) acetato complexes; influence of electronic and steric effects
Source: Royal Society of Chemistry journal article supplement (doi:10.1039/c0dt01228a), 2011-01-01
Supplement: c0dt01228a.pdf [file c0dt01228a.pdf]

**Kinetico-mechanistic studies of the acidolysis of Rh-C bonds in monocyclometallated dirhodium(II) acetato complexes; influence of electronic and steric effects.**

*Julio Esteban<sup>a</sup> and Manuel Martínez<sup>b</sup>.*

<sup>a</sup> Departament de Química Inorgànica, Universitat de València, Doctor Moliner 50, E-46100 Burjassot, València, SPAIN.

<sup>b</sup> Departament de Química Inorgànica, Universitat de Barcelona, Martí i Franquès 1-11, E-082028 Barcelona, SPAIN.

---

Supplementary material

**Figure S1.-** Observed  $^1\text{H}$  NMR spectral changes (aromatic zone,  $\text{CD}_3\text{COOD}$ ,  $65^\circ\text{C}$ ) with time on dissolution of compound  $\text{Rh}_2\text{P}(4\text{-MeC}_6\text{H}_4)_3$ . Top initial spectrum, bottom after *ca.* 7 h.

FIGURE S1

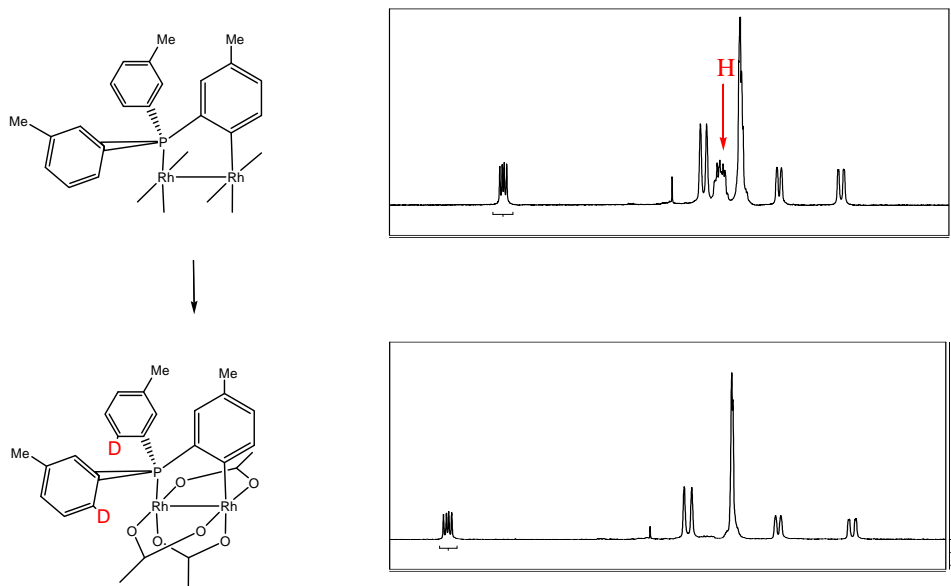

**Figure S2.-** Changes in the relative integral of selected proton signals for the relevant *ortho* hydrogens on complex  $\text{Rh}_2\text{P}(4\text{-MeC}_6\text{H}_4)_3$  with time ( $\text{CD}_3\text{COOD}$ , 400 MHz, 65 °C).

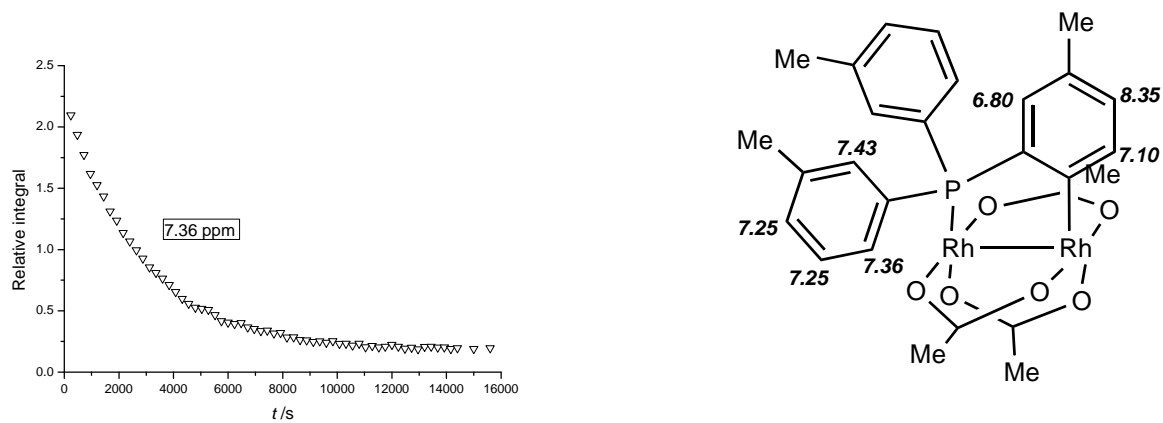

**Table S1.-** Observed rate constants for the acid cleavage of the Rh-C bonds of the different compounds studied as a function of the temperature.

| Compound                                                                         | <i>T</i> /K | <i>k</i> <sub>obs</sub> /s <sup>-1</sup> |
|----------------------------------------------------------------------------------|-------------|------------------------------------------|
| Rh <sub>2</sub> PPh <sub>3</sub>                                                 | 335         | 4.6×10 <sup>-6</sup>                     |
|                                                                                  | 344         | 1.1×10 <sup>-5</sup>                     |
|                                                                                  | 353         | 2.7×10 <sup>-5</sup>                     |
|                                                                                  | 362         | 8.2×10 <sup>-5</sup>                     |
| Rh <sub>2</sub> P(5-MeC <sub>6</sub> H <sub>4</sub> ) <sub>3</sub>               | 343         | 7.7×10 <sup>-6</sup>                     |
|                                                                                  | 353         | 1.7×10 <sup>-5</sup>                     |
|                                                                                  | 363         | 3.2×10 <sup>-5</sup>                     |
|                                                                                  | 373         | 8.8×10 <sup>-5</sup>                     |
| Rh <sub>2</sub> P(4-MeC <sub>6</sub> H <sub>4</sub> ) <sub>3</sub>               | 335         | 4.1×10 <sup>-5</sup>                     |
|                                                                                  | 344         | 1.2×10 <sup>-4</sup>                     |
|                                                                                  | 353         | 2.9×10 <sup>-4</sup>                     |
|                                                                                  | 362         | 4.4×10 <sup>-4</sup>                     |
| Rh <sub>2</sub> P(5-CF <sub>3</sub> C <sub>6</sub> H <sub>4</sub> ) <sub>3</sub> | 353         | 1.2×10 <sup>-6</sup>                     |
|                                                                                  | 363         | 2.6×10 <sup>-6</sup>                     |
|                                                                                  | 373         | 4.2×10 <sup>-6</sup>                     |
|                                                                                  | 383         | 6.2×10 <sup>-6</sup>                     |
| Rh <sub>2</sub> P(4-CF <sub>3</sub> C <sub>6</sub> H <sub>4</sub> ) <sub>3</sub> | 363         | 2.4×10 <sup>-6</sup>                     |
|                                                                                  | 373         | 3.2×10 <sup>-6</sup>                     |
|                                                                                  | 378         | 3.7×10 <sup>-6</sup>                     |
|                                                                                  | 383         | 4.5×10 <sup>-6</sup>                     |

**Table S2.-** Characterization data before H/D scrambling exchange for all the complexes studied in this work and indicated in Chart 1.

| Compound                                                                         | <sup>1</sup> H (300 MHz) in CD <sub>3</sub> COOD                                                                                       | <sup>31</sup> P (121 MHz) in CDCl <sub>3</sub>               | <sup>19</sup> F (282 MHz) in CDCl <sub>3</sub> |
|----------------------------------------------------------------------------------|----------------------------------------------------------------------------------------------------------------------------------------|--------------------------------------------------------------|------------------------------------------------|
| Rh <sub>2</sub> PPh <sub>3</sub>                                                 | 2.26 (s, 3), 2.32 (s, 6), 6.80 (m, 1), 7.07 (m, 1), 7.36 (m, 4), 7.35 (m, 2), 7.42 (m, 2), 8.35 (m, 1)                                 | 18.2 ( $J_{\text{Rh-P}} = 150$ , ${}^2J_{\text{Rh-P}} = 6$ ) | -                                              |
| Rh <sub>2</sub> P(5-MeC <sub>6</sub> H <sub>4</sub> ) <sub>3</sub>               | 2.04 (s, 3), 2.06 (s, 6), 2.39 (s, 6), 2.42 (s, 3), 6.79 (m, 1), 7.16 (m, 1), 7.39 (m, 4), 7.42(m, 4), 7.46 (m, 4), 8.29 (m, 1)        | 16.8 ( $J_{\text{Rh-P}} = 158$ , ${}^2J_{\text{Rh-P}} = 6$ ) | -                                              |
| Rh <sub>2</sub> P(4-MeC <sub>6</sub> H <sub>4</sub> ) <sub>3</sub>               | 2.06 (s, 3), 2.16 (s, 6), 2.26 (s, 3), 2.32 (s, 6), 6.80 (m, 1), 7.10 (m, 1), 7.25 (m, 4), 7.36 (m, 2), 7.43 (m, 2), 8.35 (m, 1)       | 17.7 ( $J_{\text{Rh-P}} = 150$ , ${}^2J_{\text{Rh-P}} = 6$ ) | -                                              |
| Rh <sub>2</sub> P(5-CF <sub>3</sub> C <sub>6</sub> H <sub>4</sub> ) <sub>3</sub> | 0.94 (broad, 3), 1.35 (broad, 6), 2.15 (s, 6), 2.05 (s, 3), 6.83 (m, 1), 7.10 (m, 1), 7.68 (m, 4), 7.79 (m, 4), 8.86 (broad signal, 1) | 19.8 ( $J_{\text{Rh-P}} = 154$ )                             | -66.89 ppm (s, 1), -66.39 ppm (s, 2)           |
| Rh <sub>2</sub> P(4-CF <sub>3</sub> C <sub>6</sub> H <sub>4</sub> ) <sub>3</sub> | 2.03 (s, 3), 2.16 (s, 6), 7.27 (m, 1), 7.55 (m, 1), 7.72 (m, 4), 7.88 (d, 2), 8.06 (d, 2), 8.89 (m, 1)                                 | 20.7 ( $J_{\text{Rh-P}} = 156$ )                             | -66.82 ppm (s, 1), -66.39 ppm (s, 2)           |
